# Supplementary material for: Isolation and Characterization of Facultative-Anaerobic Antimonate-Reducing Bacteria
Source: MDPI journal article supplement (doi:10.3390/microorganisms8091435), 2020-09-18
Supplement: s1 [file s1]

**Table S1.** Composition of the inorganic solution

| Component                            | Concentration |
|--------------------------------------|---------------|
| NaCl                                 | 1.2 g/L       |
| KCl                                  | 0.3 g/L       |
| NH <sub>4</sub> Cl                   | 0.3 g/L       |
| KH <sub>2</sub> PO <sub>4</sub>      | 0.2 g/L       |
| Na <sub>2</sub> SO <sub>4</sub>      | 0.009 g/L     |
| MgCl <sub>2</sub> ·6H <sub>2</sub> O | 0.4 g/L       |
| HEPES (pH 7.0)                       | 20 mM         |

**Table S2.** Buffers used to adjust the pH of LB broth in experiments to test the growth ability of strains AR-2 and AR-3

| pH  | Buffer                                                          |
|-----|-----------------------------------------------------------------|
| 5.0 | MES (2-( <i>N</i> -Morpholinoethanesulfonic acid)               |
| 6.0 | MES                                                             |
| 7.0 | HEPES (2-[4-(2-Hydroxyethyl)-1-piperazinyl]ethanesulfonic acid) |
| 7.8 | CHES ( <i>N</i> -Cyclohexyl-2-aminoethanesulfonic acid)         |
| 8.5 | CAPS ( <i>N</i> -Cyclohexyl-3-aminopropanesulfonic acid)        |

**Table S3.** Results of biochemical and assimilation tests of strains AR-2 and AR-3

| Reaction/Enzyme    |                                | AR-2 | AR-3 |
|--------------------|--------------------------------|------|------|
| Biochemical tests  | Nitrate reduction              | +    | +    |
|                    | Indole production              | -    | -    |
|                    | Glucose fermentation           | -    | -    |
|                    | Arginine dihydrolase           | -    | -    |
|                    | Urease                         | -    | -    |
|                    | Hydrolysis (esculin)           | -    | -    |
|                    | Hydrolysis (gelatin)           | -    | -    |
|                    | $\beta$ -Galactosidase         | -    | -    |
|                    | Cytochrome oxidase             | +    | +    |
| Assimilation tests | Glucose                        | -    | -    |
|                    | L-Arabinose                    | -    | -    |
|                    | D-Mannose                      | -    | -    |
|                    | D-Mannitol                     | -    | -    |
|                    | <i>N</i> -acetyl-D-glucosamine | -    | -    |
|                    | Maltose                        | +    | +    |
|                    | Potassium gluconate            | -    | -    |
|                    | n-Capric acid                  | -    | -    |
|                    | Adipic acid                    | -    | -    |
|                    | DL-Hydroxybutanedioic acid     | -    | -    |
|                    | Sodium citrate                 | -    | -    |
|                    | Phenyl acetate                 | +    | -    |

+: Positive, -: Negative

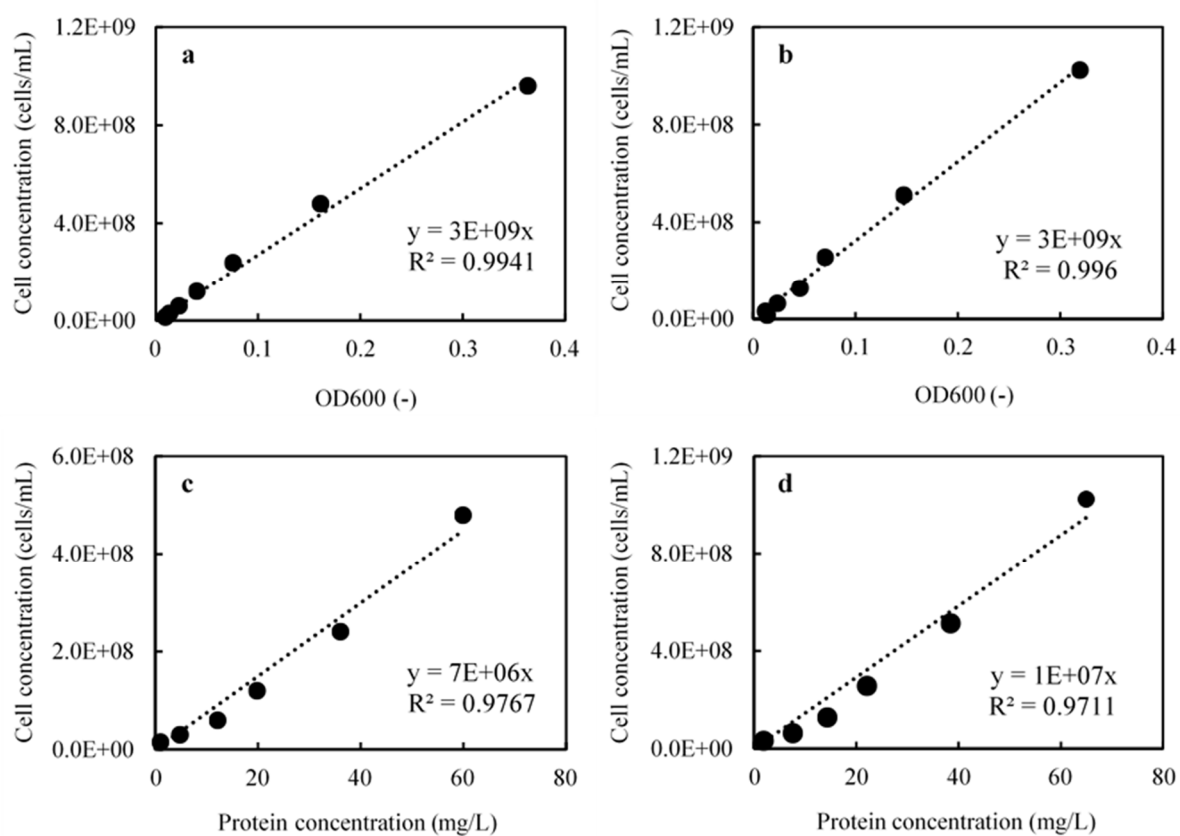

**Figure S1.** Relationships between cell concentrations and OD<sub>600</sub> values (a and b) or protein concentrations (c and d) for strains AR-2 (a and c, respectively) and AR-3 (b and d, respectively).

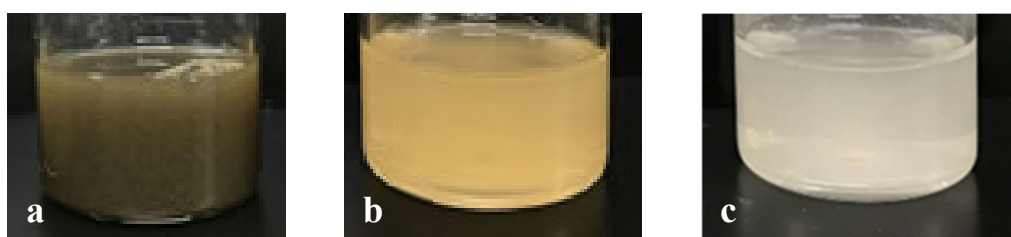

**Figure S2.** Appearance of the enrichment culture before the onset of enrichment (a) and after the 1st (b) and 6th batches (c).

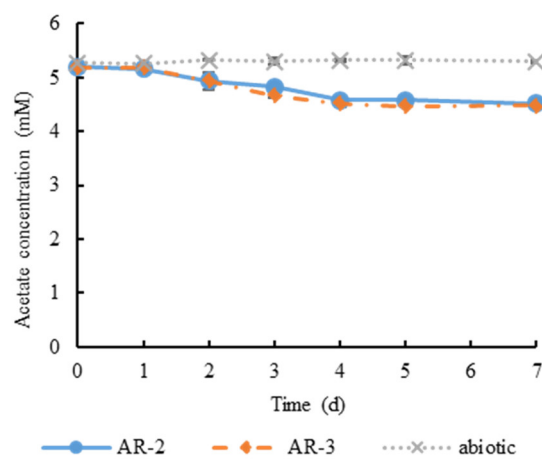

**Figure S3.** Acetate consumption during anaerobic Sb(V) reduction by strains AR-2 and AR-3. Error bars indicate the standard deviation ( $n = 3$ ).

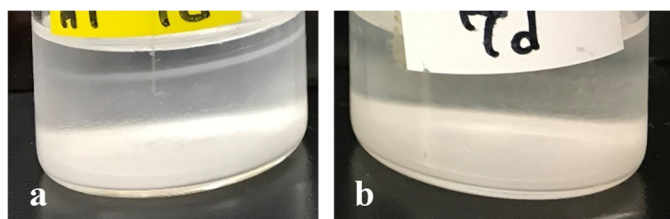

**Figure S4.** Precipitates formed during Sb(V) reduction experiments under microaerobic (a) and anaerobic conditions (b).

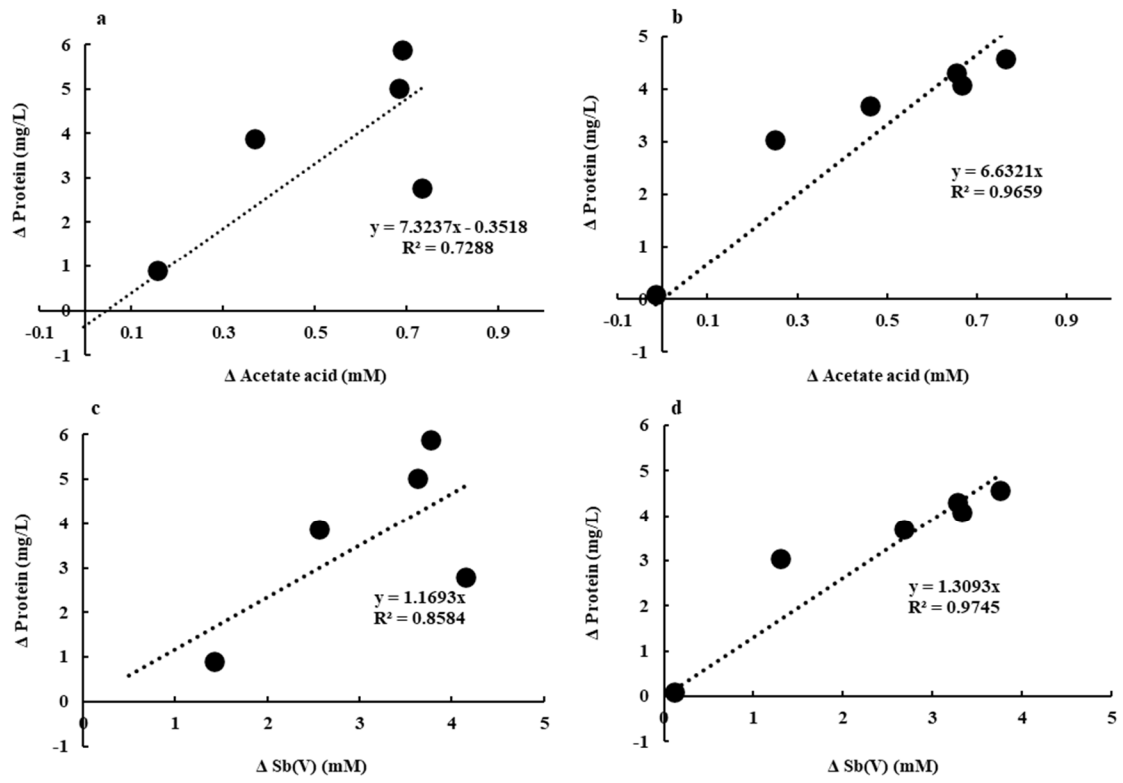

**Figure S5.** Positive correlations between cell growth represented by the increase of protein concentration and acetate consumption ( $\Delta$ Acetate) (a and b) and between cell growth and Sb(V) decline ( $\Delta$ Sb(V)) (c and d) during anaerobic Sb(V) reduction by strains AR-2 (a and c, respectively) and AR-3 (b and d, respectively).



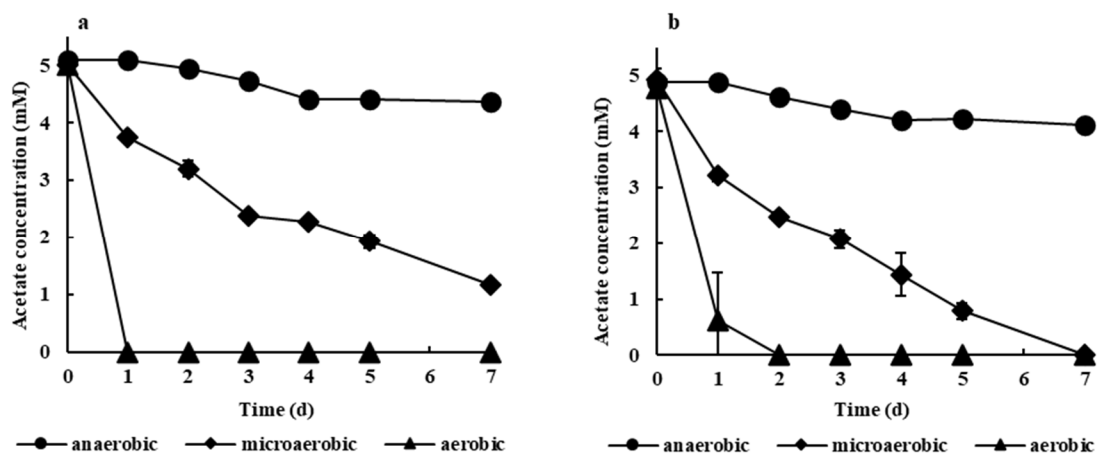

**Figure S6.** Acetate consumption during anaerobic, microaerobic and aerobic Sb(V) reduction experiments by strains AR-2 (a) and AR-3 (b). Error bars indicate the standard deviation ( $n = 3$ ).

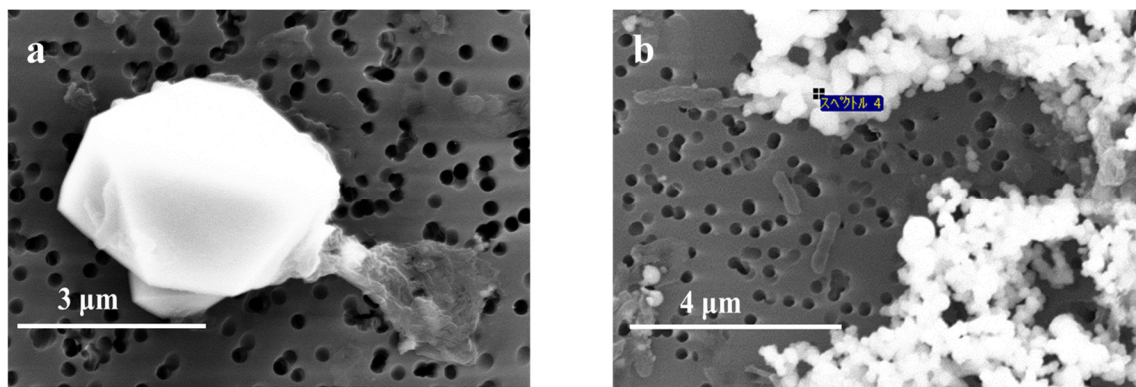

**Figure S7.** Scanning electron micrographs of precipitates after 35 d in anaerobic Sb(V) reduction experiments using strains AR-2 (a) and AR-3 (b).
